# Supplementary material
Source: Springer Nature journal article supplement (https://www.springermedizin.de/resource/supplementary/12882_2004_35_MOESM1_ESM.pdf/9454814)

# Renal outcome stratified

for eGFR (ml/min/1.73m<sup>2</sup>)

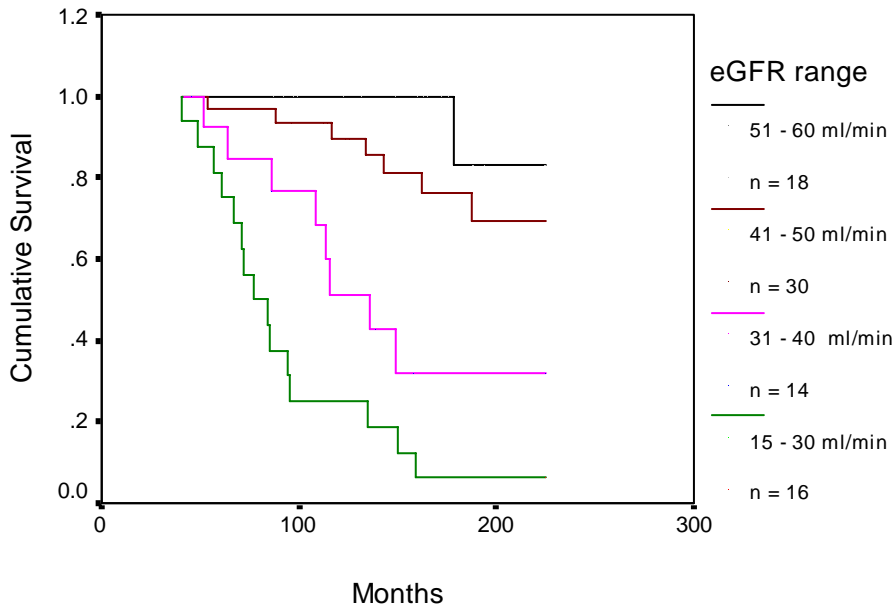

Supplement: MOESM1 [file 9454814]
